# Supplementary material for: Influence of TGFBR2, TGFB3, DNMT1, and DNMT3A Knockdowns on CTGF, TGFBR2, and DNMT3A in Neonatal and Adult Human Dermal Fibroblasts Cell Lines
Source: MDPI journal article supplement (doi:10.3390/cimb43010023), 2021-06-03
Supplement: s1 [file s1]

**Table S2.** Antibodies used for the western blot assays

| Primary antibodies          |                |               |                                         |
|-----------------------------|----------------|---------------|-----------------------------------------|
| Antibody                    | Catalog number | Concentration | Producer                                |
| anti-CTGF (E-5)             | sc-365970      | 1/100         | Santa Cruz Biotechnology,<br>Dallas, TX |
| anti-TGF- $\beta$ RII (E-6) | sc-17792       | 1/200         | Santa Cruz Biotechnology                |
| anti-Dnmt3a (A-10)          | sc-373905      | 1/100         | Santa Cruz Biotechnology                |
| anti- $\beta$ -Actin        | A2066          | 1/10000       | Sigma-Aldrich, St. Louis, MO            |
| Secondary antibodies        |                |               |                                         |
| Antibody                    | Catalog number | Concentration | Producer                                |
| anti-mouse IgG-HRP          | sc-2005        | 1/10000       | Santa Cruz Biotechnology                |
| anti-rabbit IgG-HRP         | A6154          | 1/10000       | Sigma-Aldrich                           |
