# Supplementary material for: Influence of TGFBR2, TGFB3, DNMT1, and DNMT3A Knockdowns on CTGF, TGFBR2, and DNMT3A in Neonatal and Adult Human Dermal Fibroblasts Cell Lines
Source: MDPI journal article supplement (doi:10.3390/cimb43010023), 2021-06-03
Supplement: s1 [file s1]

**Table S1.** Sequences of siRNAs applied in the transfection of human dermal fibroblasts

| siRNA           | Catalog number | Catalog number of individual siRNA duplex | Sequence in 5' → 3' orientation   |
|-----------------|----------------|-------------------------------------------|-----------------------------------|
| CTGF siRNA      | sc-39329       | sc-39329A                                 | Sense: CCAAGCCUAUCAAGUUUGAtt      |
|                 |                |                                           | Antisense: UCAAACUUGAUAGGCUUGGtt  |
|                 |                | sc-39329B                                 | Sense: GAAGACAUACCGAGCUAAAtt      |
|                 |                |                                           | Antisense: UUUAGCUCGGUAUGUCUUCtt  |
|                 |                | sc-39329C                                 | Sense: CACCAUAGGUAGAAUGUAAtt      |
|                 |                |                                           | Antisense: UUACAUUCUACCUAUGGUGtt  |
| TGF-βRII siRNA  | sc-36657       | sc-36657A                                 | Sense: CUGUAUGGAGAAAGAAUGAtt      |
|                 |                |                                           | Antisense: UCAUUCUUUCUCCAUACAGtt  |
|                 |                | sc-36657B                                 | Sense: CUCCAAAGUGCAUUAUGAAtt      |
|                 |                |                                           | Antisense: UUCAUAAUGCACUUUGGAGtt  |
|                 |                | sc-36657C                                 | Sense: CCAACAACAUCAACCACAAtt      |
|                 |                |                                           | Antisense: UUGUGGUUGAUGUUGUUGGtt  |
| TGF-β1 siRNA    | sc-270322      | sc-270322A                                | Sense: CUGCAAGACUAUCGACAUGtt      |
|                 |                |                                           | Antisense: CAUGUCGAUAGUCUUGCAGtt  |
|                 |                | sc-270322B                                | Sense: GCAACAAUCCUGGCGAUAtt       |
|                 |                |                                           | Antisense: UAUCGCCAGGAAUUGUUGCtt  |
|                 |                | sc-270322C                                | Sense: GACACCAACUAUUGCUCUAtt      |
|                 |                |                                           | Antisense: UGAAGCAAUAGUUGGUGUCtt  |
| TGF-β3 siRNA    | sc-39804       | sc-39804A                                 | Sense: GGAAUACUAUGCCAAAGAAtt      |
|                 |                |                                           | Antisense: UUCUUUGGCAUAGUAUUCctt  |
|                 |                | sc-39804B                                 | Sense: GGAAUUACCUCCAAGGUUtt       |
|                 |                |                                           | Antisense: AAACCUUGGAGGUAAUUCctt  |
|                 |                | sc-39804C                                 | Sense: GAAUCACGGUGGUAAAGAAtt      |
|                 |                |                                           | Antisense: UUCUUUACCACCGUGAUUCtt  |
| DNMT1 siRNA     | sc-156049      | sc-156049A                                | Sense: GAAGAGACGUAGAGUUACAtt      |
|                 |                |                                           | Antisense: UGUAAACUCUACGUCUCUUCtt |
|                 |                | sc-156049B                                | Sense: CCUUCACGUUCAACAUCAAtt      |
|                 |                |                                           | Antisense: UUGAUGUUGAACGUGAAGGtt  |
|                 |                | sc-156049C                                | Sense: GUGUGAGGUUCGCUUAUCAAtt     |
|                 |                |                                           | Antisense: UGAUAAGCGAACCUCACACtt  |
| DNMT3A siRNA    | sc-37757       | sc-37757A                                 | Sense: CUCAGAGCUAUUACCCAAUtt      |
|                 |                |                                           | Antisense: AUUGGGUAAUAGCUCUGAGtt  |
|                 |                | sc-37757B                                 | Sense: GAAGAAUCCCUACAAAGAAtt      |
|                 |                |                                           | Antisense: UUCUUUGUAGGGAUUCUUCtt  |
|                 |                | sc-37757C                                 | Sense: CAUCCACUGUGAAUGAUAAtt      |
|                 |                |                                           | Antisense: UUAUCAUUCACAGUGGAUGtt  |
| Control siRNA-A | sc-37007       | Confidential manufacturer' information    |                                   |
